# 1 **Harnessing Ultrasound-Stimulated Phase Change Contrast Agents to Improve Antibiotic** 2 **Efficacy Against Methicillin-Resistant *Staphylococcus aureus* Biofilms**

3  
4 Phillip G. Durham<sup>1,2</sup>, Ashelyn E. Sidders<sup>3</sup>, Paul A. Dayton<sup>1,2</sup>, Brian P. Conlon<sup>3,4</sup>, Virginie  
5 Papadopoulou<sup>1\*</sup>, Sarah E. Rowe<sup>3\*</sup>

6  
7 <sup>1</sup>Joint Department of Biomedical Engineering, The University of North Carolina and North  
8 Carolina State University, Chapel Hill, North Carolina 27599, USA

9 <sup>2</sup>Eshelman School of Pharmacy, University of North Carolina, Chapel Hill, NC 27599, USA

10 <sup>3</sup>Department of Microbiology and Immunology, University of North Carolina-Chapel Hill, Chapel  
11 Hill, North Carolina 27599, USA

12 <sup>4</sup>Marsico Lung Institute, University of North Carolina at Chapel Hill, Chapel Hill, North Carolina  
13 27599, USA

14 \* These authors contributed equally to this work

15  
16 Address correspondence to: [papadopoulou@unc.edu](mailto:papadopoulou@unc.edu) (VP), [seconlon@email.unc.edu](mailto:seconlon@email.unc.edu) (SER)

17  
18 Bacterial biofilms, often associated with chronic infections, respond poorly to antibiotic  
19 therapy and frequently require surgical intervention. Biofilms harbor persister cells, metabolically  
20 indolent cells, which are tolerant to most conventional antibiotics. In addition, the biofilm matrix  
21 can act as a physical barrier, impeding diffusion of antibiotics. Novel therapeutic approaches  
22 frequently improve biofilm killing, but usually fail to achieve eradication. Failure to eradicate the  
23 biofilm leads to chronic and relapsing infection, associated with major financial healthcare costs  
24 and significant morbidity and mortality. We address this problem with a two-pronged strategy  
25 using 1) antibiotics that target persister cells and 2) ultrasound-stimulated phase-change  
26 contrast agents (US-PCCA) , which improve antibiotic penetration.

27 We previously demonstrated that rhamnolipids, produced by *Pseudomonas aeruginosa*,  
28 could induce aminoglycoside uptake in gram-positive organisms, leading to persister cell death.  
29 We have also shown that US-PCCA can transiently disrupt biological barriers to improve  
30 penetration of therapeutic macromolecules. We hypothesized that combining antibiotics which  
31 target persister cells with US-PCCA to improve drug penetration could eradicate methicillin  
32 resistant *S. aureus* (MRSA) biofilms. Aminoglycosides alone or in combination with US-PCCA  
33 displayed limited efficacy against MRSA biofilms. In contrast, the anti-persister combination of  
34 rhamnolipids and aminoglycosides combined with US-PCCA dramatically reduced biofilm  
35 viability, frequently culminating in complete eradication of the biofilm. These data demonstrate  
36 that biofilm eradication can be achieved using a combined approach of improving drug  
37 penetration of therapeutics that target persister cells.

## 38 39 **Introduction**

40 *S. aureus* is one of the most important human bacterial pathogens and in 2017 was the  
41 cause of 20,000 bacteremia deaths in the US alone<sup>1</sup>. Infections range from minor skin and soft  
42 tissue infections (SSTI), implanted device infections to more serious infections such as  
43 osteomyelitis, endocarditis and pneumonia<sup>2,3</sup>. In addition to the high degree of mortality, chronic  
44 and relapsing *S. aureus* infections are common and associated with significant morbidity. This is

45 due to frequent treatment failure of *S. aureus* infections. This is best illustrated by SSTIs, with  
46 some studies suggesting treatment failure rates as high as 45% and a recurrence rate of 70% 4.  
47 Importantly the failure of antibiotic therapy cannot be adequately explained by antibiotic  
48 resistance 1. Failure to clear the infection leads to a need for prolonged antibiotic therapies,  
49 increased morbidity and mortality, increased likelihood of antibiotic resistance development as  
50 well as an enormous financial healthcare burden.

51 *S. aureus* forms biofilms, bacterial cells embedded in a self-produced extracellular  
52 matrix, which act as a protective barrier from the host immune response and other  
53 environmental assaults. Biofilms expand up to 1200µm in thickness when attached to indwelling  
54 devices such as catheters 5. Non-surface attached biofilms, in chronic wounds and chronic lung  
55 infections, harbor smaller non-surface attached cell aggregates ranging from 2-200µm in  
56 diameter 5,6. These biofilm aggregates are often surrounded by inflammatory immune cells such  
57 as neutrophils and embedded in a secondary host produced matrix such as mucus, pus or  
58 wound slough 7. Consequently, biofilm-embedded cells have limited access to nutrients and  
59 oxygen and are coerced into a metabolically indolent state 8.

60 It has long been appreciated that biofilms respond poorly to antibiotics 7,9-12. Most  
61 conventional bactericidal antibiotics kill by corrupting ATP-dependent cellular processes;  
62 aminoglycosides target translation, fluoroquinolones target DNA synthesis, rifampicin targets  
63 transcription and β-lactams and glycopeptides target cell wall synthesis 13,14. Cells that survive  
64 lethal doses of antibiotics in the absence of a classical resistance mechanism are called  
65 antibiotic tolerant persister cells 15. Biofilms are made up of a high proportion of persister cells 15-  
66 18. They are distinct from resistant cells as they cannot grow in the presence of the drug.  
67 However, once the drug is removed, persisters grow and repopulate a biofilm and cause a  
68 relapse in infection 13. Anti-persister antibiotics which kill independently of the metabolic state of  
69 the cell are more effective against biofilms than conventional antibiotics 19-22. Tobramycin, an  
70 aminoglycoside that requires active proton motive force (PMF) for uptake into the cell is inactive  
71 against non-respiring cells, anaerobically growing cells, small colony variants and metabolically  
72 inactive cells within a biofilm 20. We previously reported that rhamnolipids, biosurfactants  
73 produced by *P. aeruginosa*, permeabilize the *S. aureus* membrane to allow PMF-independent  
74 diffusion of tobramycin into the cell 20,22. This combination of tobramycin and rhamnolipids  
75 (TOB/RL) rapidly sterilized in vitro planktonic cultures as well as non-respiring cells,  
76 anaerobically growing cells and small colony variants. However, despite this potent anti-  
77 persister activity, TOB/RL reduced biofilm viability by ~3-logs but failed to achieve eradication 20.  
78 Notwithstanding the promise of this strategy, eradication of biofilms is arduous, even in vitro,  
79 indicating that factors other than the metabolic state of the biofilm-embedded cells are impeding  
80 therapy.

81 The biofilm matrix can act as a physical barrier to drug penetration. Penetration of  
82 oxacillin, vancomycin, cefotaxime, chloramphenicol and aminoglycoside antibiotics are impeded  
83 to some extent into *S. aureus* biofilms 23-25. Consequently, novel methods of drug delivery into  
84 biofilms is a growing area of interest. Ultrasound is a safe, commonplace, portable and relatively  
85 inexpensive modality typically used in medical imaging. This imaging capability has been  
86 expanded through the use of intravenously administered microbubbles as a contrast agent.  
87 These microbubbles are also used in a growing number of therapeutic applications to enhance

88 biological effects, which include transdermal drug delivery <sup>26</sup> and transient permeabilization of  
89 the blood brain barrier <sup>27</sup>.

90 When exposed to an ultrasound wave, gas-filled microbubbles in solution will oscillate,  
91 with the positive pressure cycle resulting in compression and the negative pressure cycle  
92 causing the bubble to expand. In an ultrasound field, microbubbles experience stable cavitation  
93 (continuous expansion and contraction) at lower pressures or inertial cavitation (violent collapse  
94 of the bubble) at higher pressures <sup>28</sup>. Stable cavitation results in microstreaming; fluid  
95 movement around the bubble which induces shear stress to nearby structures (such as  
96 biofilms). At higher pressures, inertial cavitation can result in a shockwave, producing high  
97 temperatures at a small focus, and create microjets from the directional collapse of the bubble  
98 which can puncture host cells and disrupt physical barriers <sup>29</sup>. Both of these pressure regimes  
99 have potential for therapeutic applications of ultrasound-mediated microbubble cavitation.  
100 Despite the potential of microbubbles to enhance drug delivery, their size (typically 1-4 micron in  
101 diameter) and short half-life once injected into solution may limit penetration and subsequent  
102 disruption of biofilms.

103 We hypothesized that phase change contrast agents (PCCA), submicron liquid particles  
104 (typically 100-400 nanometers in diameter) may be better equipped to penetrate a biofilm.  
105 PCCAs generally consist of a liquid perfluorocarbon droplet stabilized by a phospholipid shell.  
106 With appropriate ultrasound stimulation, PCCA can convert from the liquid phase to gas,  
107 generating a microbubble in their place (Fig. 1a). This process of “acoustic droplet vaporization”  
108 (ADV) may enhance drug penetration into biofilms as microbubbles over-expand before  
109 reaching their final diameter. Prior to activation, these particles are significantly more stable than  
110 microbubbles, with the potential to diffuse into biofilms due to their small size (Fig. 1b).  
111 Additionally, with continued ultrasound application, the resulting microbubbles can generate  
112 microstreaming, shear stress and microjets as they undergo cavitation (Fig. 1b). We  
113 hypothesized that PCCA, in combination with ultrasound (US-PCCA) and antibiotics that target  
114 persister cells is a novel biofilm eradication strategy.

115

## 116 **Results**

117 We first identified drugs with efficacy against biofilms. Antibiotics were chosen based on  
118 clinical relevance or previously reported anti-biofilm efficacy in vitro. Mature MRSA biofilms  
119 (USA300 LAC) were cultured for 24h in tissue culture treated plates before the addition of  
120 antibiotics. Following 24h of drug treatment, biofilms were washed and survivors were  
121 enumerated by plating. Tobramycin, mupirocin, vancomycin, and linezolid all caused a  
122 significant reduction in surviving biofilm cells (Fig. 2a). In contrast, levofloxacin and gentamicin  
123 showed no efficacy against biofilms at clinically achievable concentrations found in serum ( $C_{max}$ )  
124 <sup>24,25</sup> (Fig. 2a).

125 Next, we tested the ability of 30 second (s) US-PCCA treatment to potentiate tobramycin  
126 efficacy. Previous studies have indicated that negatively charged components of the biofilm  
127 matrix such as extracellular DNA and certain components of polysaccharides impede  
128 penetration of positively charged aminoglycosides such as tobramycin <sup>25,30,31</sup>. We hypothesized  
129 that US-PCCA might improve tobramycin penetration into biofilms and increase its efficacy.  
130 Mature biofilms were washed and transferred to a custom-built temperature-controlled 37°C  
131 water bath alignment setup. Tobramycin and PCCAs were added and ultrasound applied at a

132 range of rarefactional pressures (300-1200kPa). We found that tobramycin efficacy was  
133 significantly enhanced at pressures of 300, 600 and 1200 but not 900kPa in the presence of  
134 PCCAs (Fig. 2b-c). We confirmed that the addition of PCCA in the absence of ultrasound had  
135 no impact on biofilm viability. Similarly, we anticipated that ultrasound alone, in the absence of  
136 PCCA would be ineffective, however 1200 kPa did cause a small but significant reduction in  
137 surviving cells in the absence of PCCA (Fig. 2b), indicating that potentiation seen at the highest  
138 pressure (1200kPa) may not be entirely attributable to PCCA activity. In order to investigate the  
139 potentiation effects of PCCA specifically in the regime below ultrasound-alone effects, the  
140 higher pressures (900 and 1200kPa) were not evaluated further and the duty cycle lowered to  
141 10% for subsequent experiments. The lower pressures, 300 and 600kPa, in combination with  
142 PCCA were determined to be most effective at potentiating tobramycin efficacy. This is  
143 consistent with our previous findings where lower pressures (above the ADV threshold) resulted  
144 in more persistent cavitation activity during a 30s ultrasound exposure and was consistently  
145 greatest at macromolecule drug delivery across colorectal adenocarcinoma monolayers <sup>32</sup>.

146 Next, we tested the ability of US-PCCA to potentiate mupirocin, vancomycin and  
147 linezolid/rifampicin. Mupirocin is a carboxylic acid topical antibiotic commonly used to treat *S.*  
148 *aureus* infections that binds to the isoleucyl-tRNA and prevents isoleucine incorporation into  
149 proteins <sup>33</sup>. US-PCCA caused a very slight increase in mupirocin killing (41% increase in killing)  
150 that was statistically significant but of questionable biological significance (Fig. 2a-b).

151 Vancomycin is a glycopeptide that is the frontline antibiotic to treat MRSA infections.  
152 This antibiotic acts by binding to the D-Ala-D-ala residues of the membrane bound cell wall  
153 precursor, lipid II, preventing its incorporation and stalling active peptidoglycan synthesis <sup>34</sup>.  
154 Importantly, some studies have indicated that vancomycin penetration is impeded into biofilms  
155 <sup>24</sup>. US-PCCA potentiated vancomycin killing of biofilm-associated cells by 93% (Fig. 3a-b), likely  
156 by improving penetration. Notably, potentiation of vancomycin was seen with the  $C_{max}$  <sup>35</sup>  
157 indicating that at a clinically relevant concentration, US-PCCA has the capacity to improve  
158 biofilm killing of the front-line antibiotic used to treat MRSA infections.

159 Linezolid is an oxazolidinone protein synthesis inhibitor that is sometimes combined with  
160 the transcriptional inhibitor, rifampicin, for the treatment of *S. aureus* infections <sup>36,37</sup>.  
161 Linezolid/rifampicin reduced viable cells within the biofilm by almost 3-logs but was not  
162 significantly potentiated by US-PCCA. This suggests that US-PCCA has the ability to potentiate  
163 some conventional antibiotics but not others. It is possible that US-PCCA does not potentiate  
164 the killing of mupirocin and linezolid/rifampicin because the penetration of these drugs is not  
165 impeded into biofilms.

166 Although the increased killing of biofilm-associated cells with conventional antibiotics  
167 shows promise, we hypothesized that regardless of penetration, antibiotic tolerant persister cells  
168 in the biofilm are surviving and thus impeding biofilm eradication. We predicted that utilizing US-  
169 PCCA to increase penetration of drugs active against antibiotic tolerant persister cells could  
170 achieve eradication of a biofilm.

171 Daptomycin is a lipopeptide antibiotic which inserts into the cell membrane and disrupts  
172 fluid membrane microdomains <sup>38</sup>. Daptomycin has potent activity against recalcitrant  
173 populations of *S. aureus*, including biofilms <sup>39,40</sup>. Daptomycin in combination with linezolid  
174 (DAP/LIN) is the treatment recommended for persistent MRSA bacteremia or vancomycin  
175 failure in the Infectious Diseases Society of America 2011 MRSA treatment guidelines <sup>41</sup>. We

176 found that US-PCCA increased DAP/LIN killing of MRSA biofilms by 83% and 90% at 300kPa  
177 and 600kPa, respectively (Fig. 4a-b).

178 Next, we wanted to investigate if US-PCCA could improve efficacy of other drugs with  
179 anti-persister activity. Acyldepsipeptides (ADEPs) are activators of the ClpP protease. We  
180 previously reported that ADEPs sterilize persisters by activating the ClpP protease and causing  
181 the cell to self-digest in an ATP-independent manner <sup>19</sup>. ADEP in combination with rifampicin  
182 reduced biofilm cells by >4-logs in 24h. US-PCCA significantly potentiated efficacy of ADEP/RIF  
183 at 300kPa but not 600kPa (Fig. 4a-b).

184 Tobramycin combined with rhamnolipids (TOB/RL), has potent anti-persister activity and  
185 has eradicated several recalcitrant populations including non-respiring cells, anaerobically  
186 growing cells and small colony variants <sup>20</sup>. Despite this potent anti-persister activity, TOB/RL  
187 only reduced biofilm viability by ~3-logs and failed to achieve biofilm eradication <sup>20</sup>. We  
188 reasoned that drug penetration might be inhibited into the biofilms and hypothesized that  
189 improving penetration could lead to biofilm eradication. Applying US-PCCA in combination with  
190 TOB/RL increased killing of biofilm cells by 96% and 85% at 300kPa and 600kPa, respectively  
191 (Fig. 4a-b). Importantly, half of the biological replicates were eradicated to the limit of detection.  
192 Together this data indicates that anti-persister drugs have potent anti-biofilm activity and this  
193 can be potentiated further by improving penetration using US-PCCA.

194

## 195 Discussion

196 *S. aureus* biofilms rarely resolve with antibiotic treatment alone and usually require  
197 surgical intervention (debridement, drainage, incision) <sup>42</sup>. Many antibiotics reduce bacterial  
198 burdens within biofilms but eradication represents an arduous challenge even in vitro <sup>5,15</sup>. In this  
199 study, we combine two anti-biofilm strategies to achieve eradication (Fig. 5). Biofilm killing by  
200 conventional antibiotics with impeded penetration is improved by US-PCCA (Fig.2b-c, Fig.3a-b,  
201 Fig. 5), highlighting the therapeutic potential despite falling short of eradication. Targeting  
202 biofilms with anti-persister drugs increases efficacy compared to conventional antibiotics but  
203 fails to eradicate (Fig. 4a). Combining these approaches greatly improves biofilm killing, and in  
204 some cases resulted in eradication of the biofilm (Fig. 4a, Fig. 5).

205 Antibiotic treatment failure is a complex issue that imposes a heavy burden on global  
206 public health. The last new class of antibiotics to be approved by the FDA was in 2003 <sup>43</sup>. Unlike  
207 drugs for chronic illnesses that are administered for life (e.g. heart disease, diabetes), antibiotic  
208 regimens are comparatively short, rendering the profitability of antibiotic development low <sup>44</sup>.  
209 The void in the drug discovery pipeline makes sensitizing recalcitrant bacterial populations to  
210 already approved therapeutics a promising approach. The use of ultrasound and cavitation-  
211 enhancing agents for antibacterial applications, recently termed “sonobactericide”, was first  
212 published in 2011 <sup>45</sup>. While the field is still developing, a significant prospect of therapeutic  
213 ultrasound as a mechanical approach to enhance drug efficacy is its compatibility with any  
214 molecular therapeutic.

215 Microbubble oscillation has been shown to cause discrete morphologic changes in a *P.*  
216 *aeruginosa* biofilm <sup>46</sup>. Disruption of the physical structure of the biofilm may increase penetration  
217 depth of molecules which would otherwise be impeded. Disruption of the biofilm may have other  
218 indirect effects on drug efficacy. For example, bacterial biofilms are often hypoxic due to the  
219 diffusional distance limit of oxygen. Creating holes in the biofilm may allow oxygen penetration



220 and stimulate the metabolic state of the residing persister cells, rendering them sensitive to  
221 antibiotics. In support of this, ultrasound in combination with microbubbles has previously been  
222 reported to alter the metabolic state of bacterial biofilms <sup>46,47</sup>.

223 We hypothesized that PCCAs may be more efficient than microbubbles at penetrating  
224 biofilms due to their relatively small size and increased stability. The use of US-PCCAs has  
225 previously shown to increase vancomycin killing of MRSA biofilms <sup>48</sup>. In contrast to the current  
226 study, Hu et al. used perfluoropentane as the perfluorocarbon core, which requires higher  
227 pressures than octofluoropropane to vaporize. Even in the absence of an antibiotic, US-PCCA  
228 caused a significant reduction in biofilm matrix and metabolic activity measured by three-  
229 dimensional fluorescence imaging and resazurin <sup>47</sup>. The difference in quantification method  
230 makes comparison with the previous study difficult (we enumerated bacterial survivors),  
231 however our results demonstrate a significant improvement in efficacy using shorter treatment  
232 times (30 s vs 5 minutes)<sup>49</sup>. In addition, the low boiling point PCCAs used in the current study  
233 present the advantage that the same low-pressure ultrasound settings can be used for both  
234 ADV and subsequent microbubble cavitation. Indeed, this can be achieved with clinically  
235 available ultrasound hardware at pressures below the FDA set limits for diagnostic imaging.  
236 Additionally, PCCA formulation is a variant of FDA-approved ultrasound contrast microbubbles  
237 that have been clinically used for over 25 years in Europe, Asia and USA. This approach may  
238 improve the efficacy of existing approved drugs without the additional need for the extensive  
239 regulatory approval which accompanies a new molecule. Likewise, as it uses ultrasound  
240 parameters that are achievable with clinically available equipment, this has the potential for  
241 rapid translation to clinical practice without the need for further technological development.

242 The ultrasound parameters used in our study mostly varied acoustic pressure and have  
243 not yet been optimized for in vivo application. While acoustic pressure is a large contributor to  
244 PCCA activation and stimulation, other parameters of frequency, duty cycle, treatment time and  
245 PCCA concentration could be further evaluated. Ultrasound is also used clinically for  
246 debridement of wounds to disperse biofilms <sup>50</sup>. Evaluation of PCCA drug potentiation using  
247 lower frequencies and higher intensities typical for this application could give further insight into  
248 clinical integration strategies. Future experiments will evaluate the potentiation of antibiotics in a  
249 *S. aureus* mouse skin and soft tissue infection (SSTI). For topical applications such as soft  
250 tissue infections, we believe maintaining cavitation activity for the duration of the treatment will  
251 be crucial for efficacy, as no new cavitation nuclei will be introduced as would be the case in  
252 intravenously administered PCCA (replenished by blood flow).

253

## 254 **Methods**

### 255 **Biofilm assays**

256 Biofilm assays were performed using the USA300 MRSA strain LAC. It is a highly characterized  
257 community-acquired MRSA (CA-MRSA) strain isolated in 2002 from an abscess of an inmate in  
258 Los Angeles County jail in California <sup>51</sup>. LAC was cultured overnight (18h) in brain heart infusion  
259 (BHI) media (Oxoid) in biological triplicates. Each culture was diluted 1:150 in fresh media and  
260 2-3ml was added to the wells of 24-well or 12-well tissue culture treated plates (Costar),  
261 respectively. Biofilms were covered with Breathe-Easier sealing strips (Sigma) and incubated at  
262 37°C for 24h. Biofilms were carefully washed twice with PBS and fresh BHI media containing  
263 antibiotics was added. Biofilms were covered and incubated at 37°C for 24h. Biofilms were

264 carefully washed twice with PBS before dispersal in a sonicating water bath (5min) and vigorous  
265 pipetting. Surviving cells were enumerated by serial dilution and plating. Antibiotics were added  
266 at concentrations similar to the  $C_{max}$  in humans; 10 $\mu$ g/ml levofloxacin<sup>52</sup> (Alfa Aesar), 20 $\mu$ g/ml  
267 gentamicin<sup>53</sup> (Fisher BioReagents), 58 $\mu$ g/ml tobramycin<sup>54</sup> (Sigma), 50 $\mu$ g/ml vancomycin  
268 hydrochloride<sup>35</sup> (MP Biomedicals), 15 $\mu$ g/ml linezolid<sup>55</sup> (Cayman Chemical), 10 $\mu$ g/ml rifampicin<sup>56</sup>  
269 (Fisher BioReagents), 100 $\mu$ g/ml daptomycin<sup>57</sup> (Arcos Organics), with the exception of the topical  
270 antibiotic mupirocin (Sigma) (administered at 100 $\mu$ g/ml) and acyldepsipeptide antibiotic  
271 (ADEP4) which was added at 10x MIC (10 $\mu$ g/ml) which previously showed efficacy against *S.*  
272 *aureus* biofilms<sup>19</sup>. For daptomycin activity, the media was supplemented with 50mg/L of Ca<sup>2+</sup>  
273 ions. Where indicated tobramycin was supplemented with 30 $\mu$ g/ml rhamnolipids<sup>22</sup> (50/50 mix of  
274 mono- and di-rhamnolipids, Sigma). Where indicated biofilms were treated with PCCA and  
275 ultrasound.

276

### 277 **PCCA Generation**

278 Phase change contrast agents were generated as previously reported <sup>58</sup> [Sheeran et al. 2012].  
279 Briefly, 1,2-distearoyl-sn-glycero-3-phosphocholine (DSPC) and 1,2-distearoyl-sn-glycero-3-  
280 phosphoethanolamine-N-methoxy(polyethylene-glycol)-2000 (DSPE-PEG2000) (Avanti Polar  
281 Lipids, Alabaster, AL, USA) were dissolved in 5% glycerol, 15% propylene glycol (both from  
282 Fisher Chemical, Waltham, MA, USA) in PBS (v/v) at a 1:9 ratio, to a total lipid concentration of  
283 1 mg/ml. Lipid solution (1.5ml) was dispensed into 3ml crimp-top vials and degassed under  
284 vacuum for 30 minutes and then backfilled with octofluoropropane (OFP) gas (Fluoro Med,  
285 Round Rock, TX, USA). The vials were activated by mechanical agitation (VialMix, Bristol-  
286 Myers-Squibb, New York, NY, USA) to generate micron scale OFP bubbles with a lipid coat.  
287 The vials containing bubbles were cooled in an ethanol bath to -11C. Pressurized nitrogen (45  
288 PSI) was introduced by piercing the septa with a needle and used to condense the gaseous  
289 octofluoropropane into a liquid, creating lipid-shelled perfluorocarbon submicron droplets  
290 (PCCA). Particle size and concentration was characterized the Accusizer Nano FX (Entegris,  
291 Billerica, MA, USA).

292

### 293 **Ultrasound Experiments**

294 Ultrasound experiments were conducted in 12 or 24 well tissue culture plates using a custom  
295 fabricated water bath ultrasound alignment setup to maintain 37C during the experiment, similar  
296 to a design used previously with cell monolayers <sup>32</sup>. Briefly, alignment guides were positioned  
297 above the wells to ensure reproducible transducer placement to the center of each well on top  
298 of the biofilm and 10mm from their bottom. To limit acoustic reflections and standing waves from  
299 the bottom of the well plate, ultrasound gel was applied on the outside bottom of each well  
300 before the plate was positioned in the water bath, the bottom of which was lined with acoustic  
301 absorber material. The water temperature was maintained at 37C throughout the experiment by  
302 placing the water bath setup on a heated plate and monitored by thermocouple. A 1.0MHz  
303 unfocused transducer (IP0102HP, Valpey Fisher Corp) was characterized via needle  
304 hydrophone and driven with an amplified 20- or 40-cycle sinusoidal signal defined on an  
305 arbitrary function generator (AFG3021C, Tektronix, Inc.; 3100LA Power Amplifier, ENI) at a  
306 pulse-repetition frequency of 5000 Hz (10% or 20% duty cycle). Peak negative pressures of  
307 300, 600, 900 and 1200kPa were used in the experiments. To avoid ultrasound-alone effects on

308 the biofilm, we focused on the lower pressures, 300 and 600kPa, determined most effective at  
309 potentiating tobramycin efficacy with PCCA and lowered the duty cycle from 20% in Fig. 1 to  
310 10% in Fig. 2-3 as this was shown to have a more modest effect in our prior work and resulted  
311 in significant drug delivery <sup>32</sup>. Where indicated, 10 $\mu$ l of PCCA was added to each well ((1.17  $\pm$   
312 0.4)  $\times 10^{11}$  particles / mL, 0.18  $\mu$ m diameter) and mixed gently by pipetting. The transducer was  
313 positioned in the well in the media above the biofilm and ultrasound treatment was applied for  
314 30 seconds. Following treatment, each plate was incubated at 37C for 24h before enumerating  
315 survivors (described in detail above).

316

### 317 **Statistical information**

318 The averages of  $n = 3$  biologically independent samples are shown. The error bars represent  
319 the standard deviation of the mean. Statistical analysis was performed using Prism 8  
320 (GraphPad) software. One-way ANOVA with Sidak's or Dunnett's multiple comparison test (as  
321 indicated in the figure legends). Statistical significance was defined as  $P < 0.05$ .

322

### 323 **Acknowledgements**

324 This work was supported in part by NIH grants R01AI137273 and Cystic Fibrosis Research  
325 Grant to B.P.C and R33CA206939 to P.A.D. We are grateful to Nikki J. Wagner, Lauren C.  
326 Radlinski and Matthew Wolfgang for technical advice, as well as Brian Velasco for assistance  
327 with PCCA preparation.

328

### 329 **Competing interests**

330 P.A.D declares that he is a co-inventor on a patent describing the formulation of low boiling-  
331 point perfluorocarbon agents and a cofounder of Triangle Biotechnology, a company that has  
332 licensed this patent. Additionally, P.G.D, P.A.D., B.P.C., V.P. and S.E.R. are all co-inventors on  
333 a provisional patent describing the use of low boiling-point phase change contrast agents for  
334 enhancing the delivery of therapeutics agents to biofilms. Additionally, B.P.C and S.E.R are co-  
335 inventors on a provisional patent describing the use of rhamnolipids for potentiating antibiotic  
336 efficacy. A.E.S declares that she has no competing interests.

337

### 338 **References**

- 339 1 Kourtis, A. P. *et al.* Vital Signs: Epidemiology and Recent Trends in Methicillin-Resistant  
340 and in Methicillin-Susceptible *Staphylococcus aureus* Bloodstream Infections - United  
341 States. *MMWR Morb Mortal Wkly Rep* **68**, 214-219, doi:10.15585/mmwr.mm6809e1  
342 (2019).
- 343 2 Boucher, H. W. & Corey, G. R. Epidemiology of methicillin-resistant *Staphylococcus*  
344 *aureus*. *Clin Infect Dis* **46 Suppl 5**, S344-349, doi:10.1086/533590 (2008).
- 345 3 Magill, S. S. *et al.* Changes in Prevalence of Health Care-Associated Infections in U.S.  
346 Hospitals. *N Engl J Med* **379**, 1732-1744, doi:10.1056/NEJMoa1801550 (2018).
- 347 4 Olaniyi, R., Pozzi, C., Grimaldi, L. & Bagnoli, F. *Staphylococcus aureus*-Associated Skin  
348 and Soft Tissue Infections: Anatomical Localization, Epidemiology, Therapy and  
349 Potential Prophylaxis. *Curr Top Microbiol Immunol* **409**, 199-227,  
350 doi:10.1007/82\_2016\_32 (2017).
- 351 5 Bjarnsholt, T. *et al.* The in vivo biofilm. *Trends Microbiol* **21**, 466-474,  
352 doi:10.1016/j.tim.2013.06.002 (2013).



- 353 6 Bjarnsholt, T. *et al.* Pseudomonas aeruginosa biofilms in the respiratory tract of cystic  
354 fibrosis patients. *Pediatr Pulmonol* **44**, 547-558, doi:10.1002/ppul.21011 (2009).
- 355 7 Sonderholm, M. *et al.* The Consequences of Being in an Infectious Biofilm:  
356 Microenvironmental Conditions Governing Antibiotic Tolerance. *Int J Mol Sci* **18**,  
357 doi:10.3390/ijms18122688 (2017).
- 358 8 Stewart, P. S. & Franklin, M. J. Physiological heterogeneity in biofilms. *Nat Rev Microbiol*  
359 **6**, 199-210, doi:10.1038/nrmicro1838 (2008).
- 360 9 Stewart, P. S. & Costerton, J. W. Antibiotic resistance of bacteria in biofilms. *Lancet* **358**,  
361 135-138, doi:10.1016/s0140-6736(01)05321-1 (2001).
- 362 10 Lewis, K. Riddle of biofilm resistance. *Antimicrob Agents Chemother* **45**, 999-1007,  
363 doi:10.1128/AAC.45.4.999-1007.2001 (2001).
- 364 11 Mah, T. F. & O'Toole, G. A. Mechanisms of biofilm resistance to antimicrobial agents.  
365 *Trends Microbiol* **9**, 34-39, doi:10.1016/s0966-842x(00)01913-2 (2001).
- 366 12 Crabbe, A., Jensen, P. O., Bjarnsholt, T. & Coenye, T. Antimicrobial Tolerance and  
367 Metabolic Adaptations in Microbial Biofilms. *Trends Microbiol* **27**, 850-863,  
368 doi:10.1016/j.tim.2019.05.003 (2019).
- 369 13 Lewis, K. Persister cells. *Annu Rev Microbiol* **64**, 357-372,  
370 doi:10.1146/annurev.micro.112408.134306 (2010).
- 371 14 Kohanski, M. A., Dwyer, D. J. & Collins, J. J. How antibiotics kill bacteria: from targets to  
372 networks. *Nat Rev Microbiol* **8**, 423-435, doi:10.1038/nrmicro2333 (2010).
- 373 15 Waters, E. M., Rowe, S. E., O'Gara, J. P. & Conlon, B. P. Convergence of  
374 Staphylococcus aureus Persister and Biofilm Research: Can Biofilms Be Defined as  
375 Communities of Adherent Persister Cells? *PLoS Pathog* **12**, e1006012,  
376 doi:10.1371/journal.ppat.1006012 (2016).
- 377 16 Wood, T. K., Knabel, S. J. & Kwan, B. W. Bacterial persister cell formation and  
378 dormancy. *Appl Environ Microbiol* **79**, 7116-7121, doi:10.1128/AEM.02636-13 (2013).
- 379 17 Lewis, K. Multidrug tolerance of biofilms and persister cells. *Curr Top Microbiol Immunol*  
380 **322**, 107-131, doi:10.1007/978-3-540-75418-3\_6 (2008).
- 381 18 Wood, T. K. Strategies for combating persister cell and biofilm infections. *Microb*  
382 *Biotechnol* **10**, 1054-1056, doi:10.1111/1751-7915.12774 (2017).
- 383 19 Conlon, B. P. *et al.* Activated ClpP kills persisters and eradicates a chronic biofilm  
384 infection. *Nature* **503**, 365-370, doi:10.1038/nature12790 (2013).
- 385 20 Radlinski, L. C. a. R., Sarah E. and Brzozowski, Robert and Wilkinson, Alec and Huang,  
386 Rennica and Eswara, Prahathes and Conlon, Brian P. Chemical Induction of  
387 Aminoglycoside Uptake Overcomes Antibiotic Tolerance and Resistance in  
388 Staphylococcus Aureus. *CELL CHEMICAL BIOLOGY* (2019).
- 389 21 Bauer, J., Siala, W., Tulkens, P. M. & Van Bambeke, F. A combined pharmacodynamic  
390 quantitative and qualitative model reveals the potent activity of daptomycin and  
391 delafloxacin against Staphylococcus aureus biofilms. *Antimicrob Agents Chemother* **57**,  
392 2726-2737, doi:10.1128/AAC.00181-13 (2013).
- 393 22 Radlinski, L. *et al.* Pseudomonas aeruginosa exoproducts determine antibiotic efficacy  
394 against Staphylococcus aureus. *PLoS Biol* **15**, e2003981,  
395 doi:10.1371/journal.pbio.2003981 (2017).
- 396 23 Singh, R., Ray, P., Das, A. & Sharma, M. Penetration of antibiotics through  
397 Staphylococcus aureus and Staphylococcus epidermidis biofilms. *J Antimicrob*  
398 *Chemother* **65**, 1955-1958, doi:10.1093/jac/dkq257 (2010).
- 399 24 Singh, R., Sahore, S., Kaur, P., Rani, A. & Ray, P. Penetration barrier contributes to  
400 bacterial biofilm-associated resistance against only select antibiotics, and exhibits  
401 genus-, strain- and antibiotic-specific differences. *Pathog Dis* **74**,  
402 doi:10.1093/femspd/ftw056 (2016).

- 403 25 Goltermann, L. & Tolker-Nielsen, T. Importance of the Exopolysaccharide Matrix in  
404 Antimicrobial Tolerance of *Pseudomonas aeruginosa* Aggregates. *Antimicrob Agents*  
405 *Chemother* **61**, doi:10.1128/AAC.02696-16 (2017).
- 406 26 Oberli, M. A., Schoellhammer, C. M., Langer, R. & Blankschtein, D. Ultrasound-  
407 enhanced transdermal delivery: recent advances and future challenges. *Ther Deliv* **5**,  
408 843-857, doi:10.4155/tde.14.32 (2014).
- 409 27 Konofagou, E. E. *et al.* Ultrasound-induced blood-brain barrier opening. *Curr Pharm*  
410 *Biotechnol* **13**, 1332-1345, doi:10.2174/138920112800624364 (2012).
- 411 28 Church, C. C. & Carstensen, E. L. "Stable" inertial cavitation. *Ultrasound Med Biol* **27**,  
412 1435-1437, doi:10.1016/s0301-5629(01)00441-0 (2001).
- 413 29 Tzu-Yin, W., Wilson, K. E., Machtaler, S. & Willmann, J. K. Ultrasound and microbubble  
414 guided drug delivery: mechanistic understanding and clinical implications. *Curr Pharm*  
415 *Biotechnol* **14**, 743-752, doi:10.2174/1389201014666131226114611 (2013).
- 416 30 Chiang, W. C. *et al.* Extracellular DNA shields against aminoglycosides in *Pseudomonas*  
417 *aeruginosa* biofilms. *Antimicrob Agents Chemother* **57**, 2352-2361,  
418 doi:10.1128/AAC.00001-13 (2013).
- 419 31 Tseng, B. S. *et al.* The extracellular matrix protects *Pseudomonas aeruginosa* biofilms  
420 by limiting the penetration of tobramycin. *Environ Microbiol* **15**, 2865-2878,  
421 doi:10.1111/1462-2920.12155 (2013).
- 422 32 Fix, S. M. *et al.* Ultrasound-Stimulated Phase-Change Contrast Agents for  
423 Transepithelial Delivery of Macromolecules, Toward Gastrointestinal Drug Delivery.  
424 *Ultrasound Med Biol* **45**, 1762-1776, doi:10.1016/j.ultrasmedbio.2019.02.004 (2019).
- 425 33 Hughes, J. & Mellows, G. Interaction of pseudomonic acid A with *Escherichia coli* B  
426 isoleucyl-tRNA synthetase. *Biochem J* **191**, 209-219 (1980).
- 427 34 Healy, V. L., Lessard, I. A., Roper, D. I., Knox, J. R. & Walsh, C. T. Vancomycin  
428 resistance in enterococci: reprogramming of the D-ala-D-Ala ligases in bacterial  
429 peptidoglycan biosynthesis. *Chem Biol* **7**, R109-119, doi:10.1016/s1074-5521(00)00116-  
430 2 (2000).
- 431 35 Barcia-Macay, M., Lemaire, S., Mingeot-Leclercq, M. P., Tulkens, P. M. & Van  
432 Bambeke, F. Evaluation of the extracellular and intracellular activities (human THP-1  
433 macrophages) of telavancin versus vancomycin against methicillin-susceptible,  
434 methicillin-resistant, vancomycin-intermediate and vancomycin-resistant *Staphylococcus*  
435 *aureus*. *J Antimicrob Chemother* **58**, 1177-1184, doi:10.1093/jac/dkl424 (2006).
- 436 36 Schwalm, J. D., El-Helou, P. & Lee, C. H. Clinical outcome with oral linezolid and  
437 rifampin following recurrent methicillin-resistant *Staphylococcus aureus* bacteremia  
438 despite prolonged vancomycin treatment. *Can J Infect Dis* **15**, 97-100,  
439 doi:10.1155/2004/768765 (2004).
- 440 37 Hashimoto, S. *et al.* Effect of coadministration of rifampicin on the pharmacokinetics of  
441 linezolid: clinical and animal studies. *J Pharm Health Care Sci* **4**, 27,  
442 doi:10.1186/s40780-018-0123-1 (2018).
- 443 38 Grein, F. *et al.* Ca(2+)-Daptomycin targets cell wall biosynthesis by forming a tripartite  
444 complex with undecaprenyl-coupled intermediates and membrane lipids. *Nat Commun*  
445 **11**, 1455, doi:10.1038/s41467-020-15257-1 (2020).
- 446 39 Lechner, S., Lewis, K. & Bertram, R. *Staphylococcus aureus* persists tolerant to  
447 bactericidal antibiotics. *J Mol Microbiol Biotechnol* **22**, 235-244, doi:10.1159/000342449  
448 (2012).
- 449 40 Raad, I. *et al.* Comparative activities of daptomycin, linezolid, and tigecycline against  
450 catheter-related methicillin-resistant *Staphylococcus* bacteremic isolates embedded in  
451 biofilm. *Antimicrob Agents Chemother* **51**, 1656-1660, doi:10.1128/AAC.00350-06  
452 (2007).

- 453 41 Liu, C. *et al.* Clinical practice guidelines by the infectious diseases society of america for  
454 the treatment of methicillin-resistant *Staphylococcus aureus* infections in adults and  
455 children: executive summary. *Clin Infect Dis* **52**, 285-292, doi:10.1093/cid/cir034 (2011).
- 456 42 Negut, I., Grumezescu, V. & Grumezescu, A. M. Treatment Strategies for Infected  
457 Wounds. *Molecules* **23**, doi:10.3390/molecules23092392 (2018).
- 458 43 Fair, R. J. & Tor, Y. Antibiotics and bacterial resistance in the 21st century. *Perspect*  
459 *Medicin Chem* **6**, 25-64, doi:10.4137/PMC.S14459 (2014).
- 460 44 Bartlett, J. G., Gilbert, D. N. & Spellberg, B. Seven ways to preserve the miracle of  
461 antibiotics. *Clin Infect Dis* **56**, 1445-1450, doi:10.1093/cid/cit070 (2013).
- 462 45 Lattwein, K. R. *et al.* Sonobactericide: An Emerging Treatment Strategy for Bacterial  
463 Infections. *Ultrasound Med Biol* **46**, 193-215, doi:10.1016/j.ultrasmedbio.2019.09.011  
464 (2020).
- 465 46 Ronan, E., Edjiu, N., Kroukamp, O., Wolfaardt, G. & Karshafian, R. USMB-induced  
466 synergistic enhancement of aminoglycoside antibiotics in biofilms. *Ultrasonics* **69**, 182-  
467 190, doi:10.1016/j.ultras.2016.03.017 (2016).
- 468 47 Hu, J. *et al.* The synergistic bactericidal effect of vancomycin on UTMD treated biofilm  
469 involves damage to bacterial cells and enhancement of metabolic activities. *Sci Rep* **8**,  
470 192, doi:10.1038/s41598-017-18496-3 (2018).
- 471 48 Guo, H. *et al.* Stimulated phase-shift acoustic nanodroplets enhance vancomycin  
472 efficacy against methicillin-resistant *Staphylococcus aureus* biofilms. *Int J Nanomedicine*  
473 **12**, 4679-4690, doi:10.2147/IJN.S134525 (2017).
- 474 49 . (!!! INVALID CITATION !!! 44).
- 475 50 Chang, Y. R., Perry, J. & Cross, K. Low-Frequency Ultrasound Debridement in Chronic  
476 Wound Healing: A Systematic Review of Current Evidence. *Plast Surg (Oakv)* **25**, 21-26,  
477 doi:10.1177/2292550317693813 (2017).
- 478 51 Kennedy, A. D. *et al.* Epidemic community-associated methicillin-resistant  
479 *Staphylococcus aureus*: recent clonal expansion and diversification. *Proc Natl Acad Sci*  
480 *U S A* **105**, 1327-1332, doi:10.1073/pnas.0710217105 (2008).
- 481 52 Cao, G. *et al.* Pharmacokinetics and pharmacodynamics of levofloxacin injection in  
482 healthy Chinese volunteers and dosing regimen optimization. *J Clin Pharm Ther* **38**,  
483 394-400, doi:10.1111/jcpt.12074 (2013).
- 484 53 Lanao, J. M. *et al.* Pharmacokinetic basis for the use of extended interval dosage  
485 regimens of gentamicin in neonates. *J Antimicrob Chemother* **54**, 193-198,  
486 doi:10.1093/jac/dkh261 (2004).
- 487 54 Burkhardt, O. *et al.* Once-daily tobramycin in cystic fibrosis: better for clinical outcome  
488 than thrice-daily tobramycin but more resistance development? *J Antimicrob Chemother*  
489 **58**, 822-829, doi:10.1093/jac/dkl328 (2006).
- 490 55 MacGowan, A. P. Pharmacokinetic and pharmacodynamic profile of linezolid in healthy  
491 volunteers and patients with Gram-positive infections. *J Antimicrob Chemother* **51 Suppl**  
492 **2**, ii17-25, doi:10.1093/jac/dkg248 (2003).
- 493 56 Peloquin, C. A. *et al.* Population pharmacokinetic modeling of isoniazid, rifampin, and  
494 pyrazinamide. *Antimicrob Agents Chemother* **41**, 2670-2679 (1997).
- 495 57 Benvenuto, M., Benziger, D. P., Yankelev, S. & Vigliani, G. Pharmacokinetics and  
496 tolerability of daptomycin at doses up to 12 milligrams per kilogram of body weight once  
497 daily in healthy volunteers. *Antimicrob Agents Chemother* **50**, 3245-3249,  
498 doi:10.1128/AAC.00247-06 (2006).
- 499 58 Sheeran, P. S., Luois, S., Dayton, P. A. & Matsunaga, T. O. Formulation and acoustic  
500 studies of a new phase-shift agent for diagnostic and therapeutic ultrasound. *Langmuir*  
501 **27**, 10412-10420, doi:10.1021/la2013705 (2011).
- 502
- 503

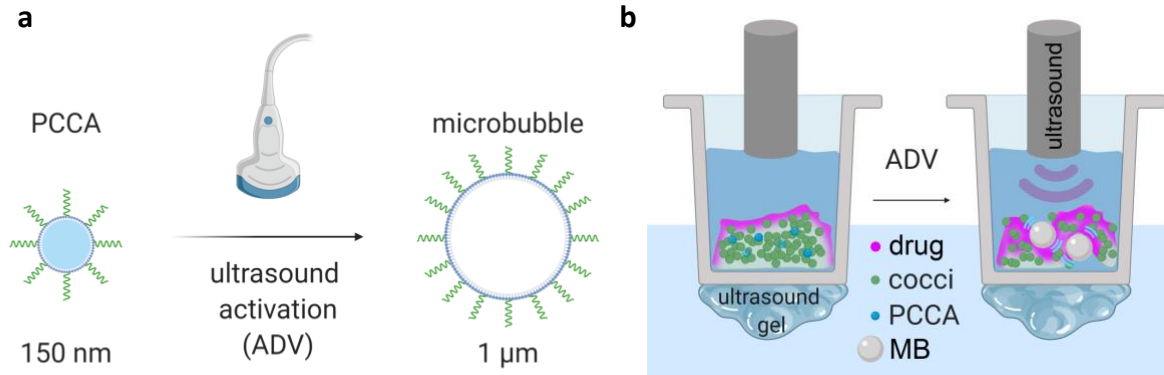

504  
505  
506  
507  
508  
509  
510  
511  
512  
513

**Fig 1. PCCA and ultrasound disrupts biofilm and increases drug penetration.** Nanoscale PCCA are in a stable liquid phase. When exposed to ultrasound, the lipid shell containing superheated liquid perfluorocarbon is destabilized, causing the liquid to vaporize (acoustic droplet vaporization, ADV) to the gas phase and expand into a microbubble (a). The stability and small size of PCCA makes them ideal to diffuse into biofilms prior to ultrasound application. Ultrasound stimulation can vaporize PCCA to microbubbles that can physically disrupt biofilms and enhance drug penetration (b).

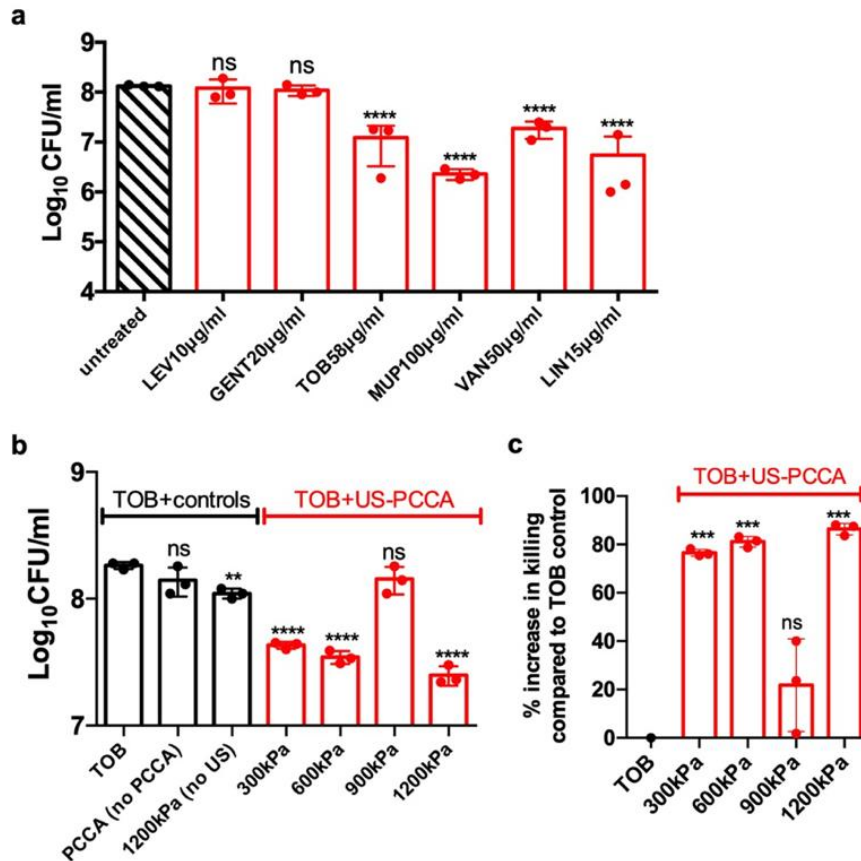

514  
515  
516  
517  
518  
519  
520  
521  
522  
523  
524  
525  
526  
527  
528  
529  
530

**Fig. 2: MRSA biofilms display high tolerance to clinically relevant antibiotics.** MRSA strain LAC biofilms were cultured overnight in brain-heart infusion (BHI) media in 12-well tissue culture treated plates. Biofilms were washed and treated with antibiotics (a-c). Where indicated, 12-well plates were transferred to a custom-built temperature-controlled 37°C water bath alignment setup. PCCA were added and 30s ultrasound exposure was applied at indicated pressures and 20% duty cycle (b-c). After 24h, biofilms were washed, sonicated for disruption and surviving cells were enumerated by serial dilution plating. Survivors were presented as log<sub>10</sub>CFU/ml (a-b) or as % increase in killing compared to tobramycin control (c) (extrapolated from a). The averages of  $n = 3$  biologically independent samples are shown. The error bars represent the standard deviation. Statistical significance was determined using a one-way analysis of variance (ANOVA) with Dunnett's (a, c) or Sidak's multiple comparison test (b). \*\*, \*\*\*, \*\*\*\* denotes  $P < 0.005$ ,  $P < 0.0005$ ,  $P < 0.0001$ , respectively. LEV, levofloxacin; GENT, gentamicin; TOB, tobramycin; MUP, mupirocin; VAN, vancomycin; LIN, linezolid, ns, not significant; US-PCCA, ultrasound-stimulated phase change contrast agents.



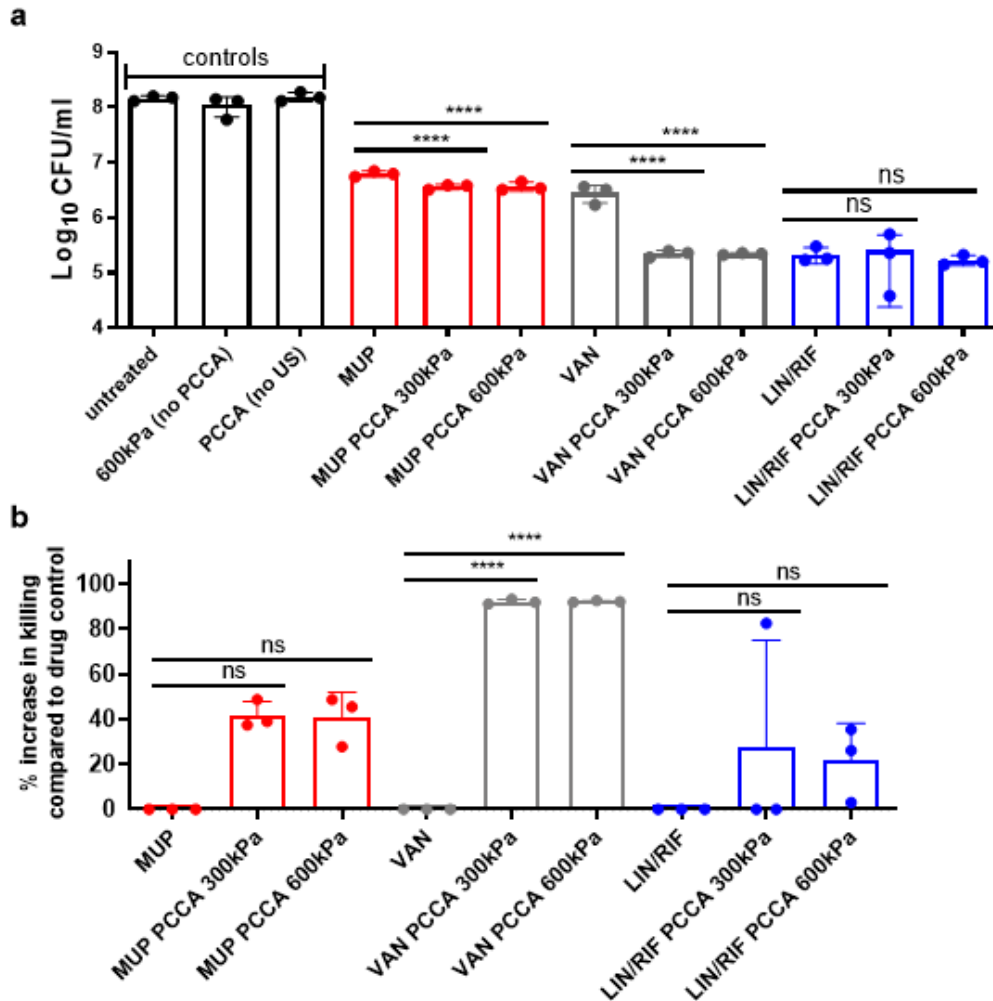

531  
 532 **Fig. 3: US-PCCA improve vancomycin killing of MRSA biofilms.** MRSA strain LAC biofilms  
 533 were cultured overnight in brain-heart infusion (BHI) media in 24-well tissue culture treated  
 534 plates. Biofilms were washed and treated with antibiotics and transferred to a custom-built  
 535 temperature-controlled 37°C water bath alignment setup. PCCA were added and 30s ultrasound  
 536 exposure was applied at indicated pressures and 10% duty cycle. After 24h, biofilms were  
 537 washed, sonicated for disruption and surviving cells were enumerated by serial dilution plating.  
 538 Survivors were presented as log<sub>10</sub>CFU/ml (a) or as % increase in killing compared to antibiotic  
 539 control (b) (extrapolated from a). The averages of  $n = 3$  biologically independent samples are  
 540 shown. The error bars represent the standard deviation. Statistical significance was determined  
 541 using a one-way analysis of variance (ANOVA) with Sidak's multiple comparison test. \*\*\*\*  
 542 denotes  $P < 0.0001$ , respectively. MUP, 100µg/ml mupirocin; VAN, 50µg/ml vancomycin; LIN,  
 543 15µg/ml linezolid; RIF, 10µg/ml rifampicin; ns, not significant; US-PCCA, ultrasound-stimulated  
 544 phase change contrast agents.  
 545

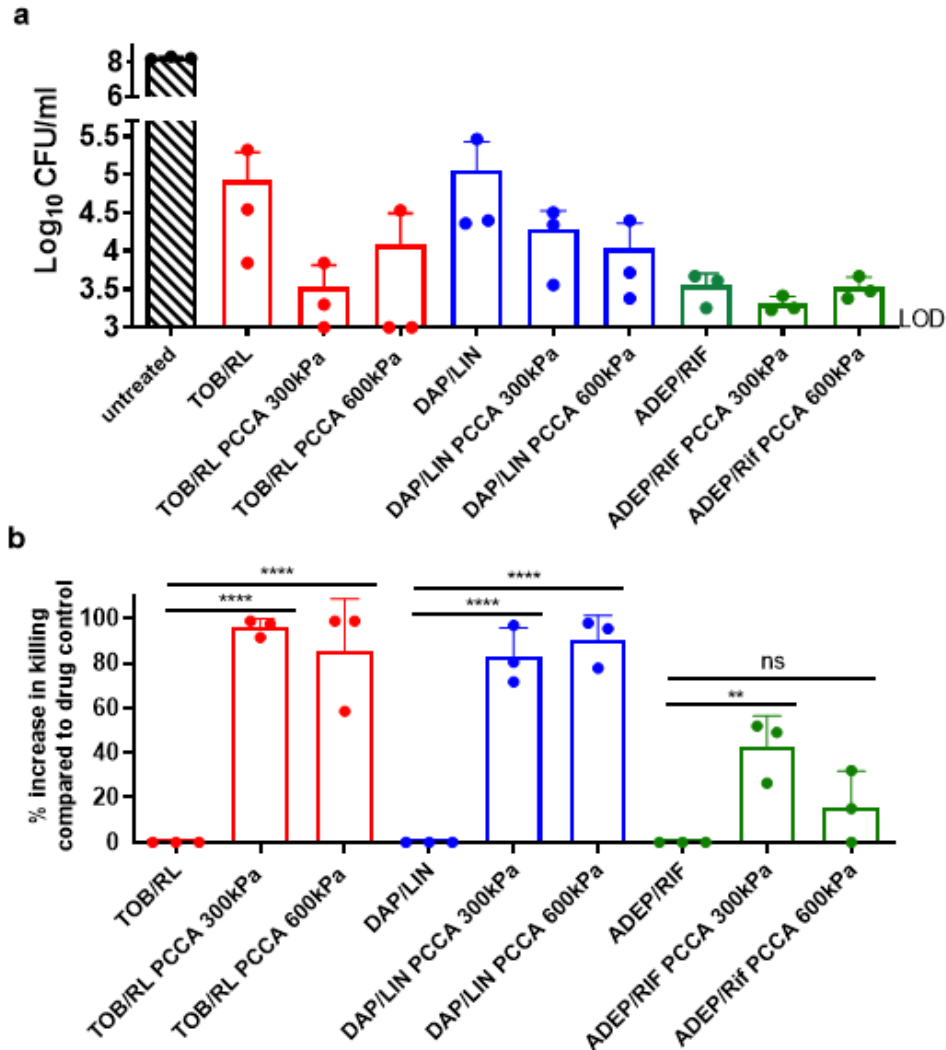

546  
 547 **Fig. 4: US-PCCA improves anti-persister antibiotic therapy against MRSA biofilms.** MRSA  
 548 strain LAC biofilms were cultured overnight in brain-heart infusion (BHI) media in 12-well  
 549 (TOB/RL) or 24-well (all other drugs) tissue culture treated plates. Biofilms were washed and  
 550 treated with antibiotics and transferred to a custom-built temperature-controlled 37°C water bath  
 551 alignment setup. PCCAs were added and 30s ultrasound exposure was applied at indicated  
 552 pressures and 10% duty cycle. After 24h, biofilms were washed, sonicated for disruption and  
 553 surviving cells were enumerated by serial dilution plating. Survivors were presented as  
 554 log<sub>10</sub>CFU/ml (a) or as % increase in killing compared to antibiotic control (b) (extrapolated from  
 555 a). The averages of  $n = 3$  biologically independent samples are shown. The error bars represent  
 556 the standard deviation. Statistical significance was determined using a one-way analysis of  
 557 variance (ANOVA) with Sidak's multiple comparison test (b). \*\*, \*\*\*\* denotes  $P < 0.005$ ,  
 558  $P < 0.0001$ , respectively. TOB, 58µg/ml tobramycin; RL, 30µg/ml rhamnolipids; DAP, 100µg/ml  
 559 daptomycin; LIN, 15µg/ml linezolid; RIF, 10µg/ml rifampicin; ADEP, 5µg/ml acyldepsipeptide;  
 560 ns, not significant; US-PCCA, ultrasound-stimulated phase change contrast agents, LOD; limit  
 561 of detection.  
 562

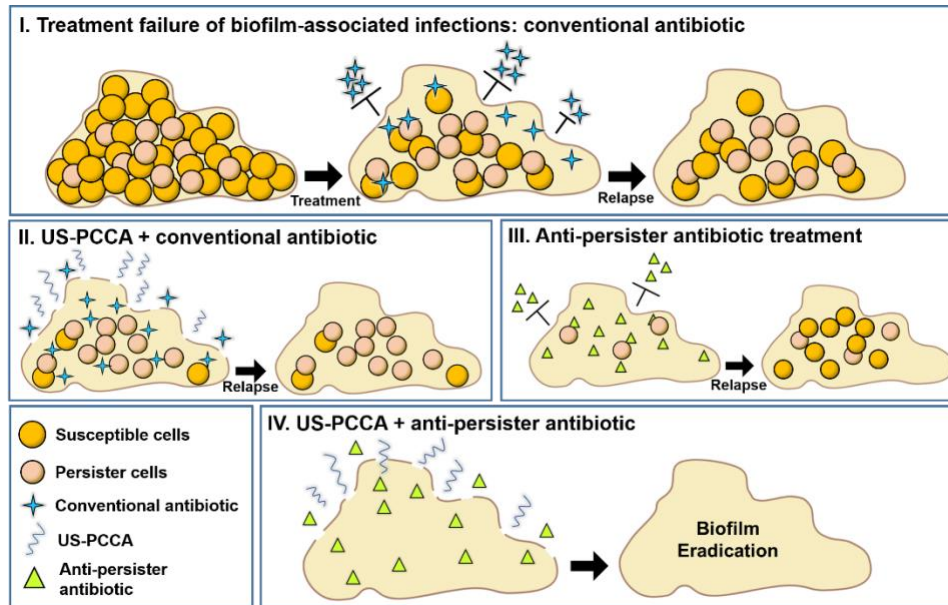

563  
564  
565  
566  
567  
568  
569  
570  
571  
572  
573  
574  
575  
576

**Fig. 5: Schematic representing a dual approach to improving antibiotic therapy against *S. aureus* biofilms.** (I) Biofilms display remarkable tolerance to antibiotics. Susceptible cells at the biofilm periphery die (susceptible cells) while less metabolically active cells within the biofilm are tolerant to conventional antibiotics (persister cells). Failure to eradicate the biofilm leads to relapse in infection following removal of the antibiotic. (II) Improving penetration of conventional antibiotics using US-PCCA will improve efficacy of some conventional antibiotics that do not penetrate well through the biofilm matrix. This strategy is futile as it does not improve killing of persister cells and leads to relapse. (III) Targeting biofilms with antibiotics which kill persister cells (anti-persister antibiotics) improves efficacy but if drug penetration is impeded into the biofilm, some persister cells will remain following drug treatment and lead to relapse. (IV) Improving penetration of anti-persister antibiotics into the biofilm can lead to the eradication of all cells within a biofilm and prevent relapse of infection following removal of the antibiotic.
